# Supplementary material for: Reversible functionalization and exfoliation of graphite by a Diels–Alder reaction with furfuryl amine
Source: Royal Society of Chemistry journal article supplement (doi:10.1039/d2ra02566c), 2022-01-01
Supplement: d2ra02566c1.pdf [file d2ra02566c1.pdf]

Electronic Supplementary Information (ESI)

## Reversible Functionalization and Exfoliation of Graphite by a Diels-Alder Reaction with Furfuryl Amine

Najmeh Filvan Torkaman,<sup>a</sup> Marina Kley,<sup>b</sup> Wolfgang Bremser,<sup>b\*</sup> René Wilhelm<sup>c\*</sup>

<sup>a</sup>*Paderborn University, Faculty of Mechanical engineering, Coatings, Materials and Polymers (CMP), Technology and Diversity (TD), Warburger Str. 100, 33098, Paderborn, Germany*

<sup>b</sup>*Paderborn University, Faculty of Mechanical engineering, Coatings, Materials and Polymers (CMP), Warburger Str. 100, 33098, Paderborn, Germany, Email: wolfgang.bremser@uni-paderborn.de*

<sup>c</sup>*Clausthal University of Technology, Institute for Organic Chemistry, Leibnizstrasse 6, 38678 Clausthal-Zellerfeld, Germany, Email: rene.wilhelm@tu-clausthal.de*

|                                                                    |           |
|--------------------------------------------------------------------|-----------|
| <b>Fig. S1</b> Experimental setup for the synthesis of <b>G-FA</b> | <b>S2</b> |
| <b>Fig. S2</b> XRD patterns                                        | <b>S3</b> |
| <b>Fig. S3</b> XPS spectra                                         | <b>S4</b> |
| <b>Fig. S4.</b> SEM images                                         | <b>S5</b> |
| <b>Fig. S5.</b> AFM images                                         | <b>S6</b> |

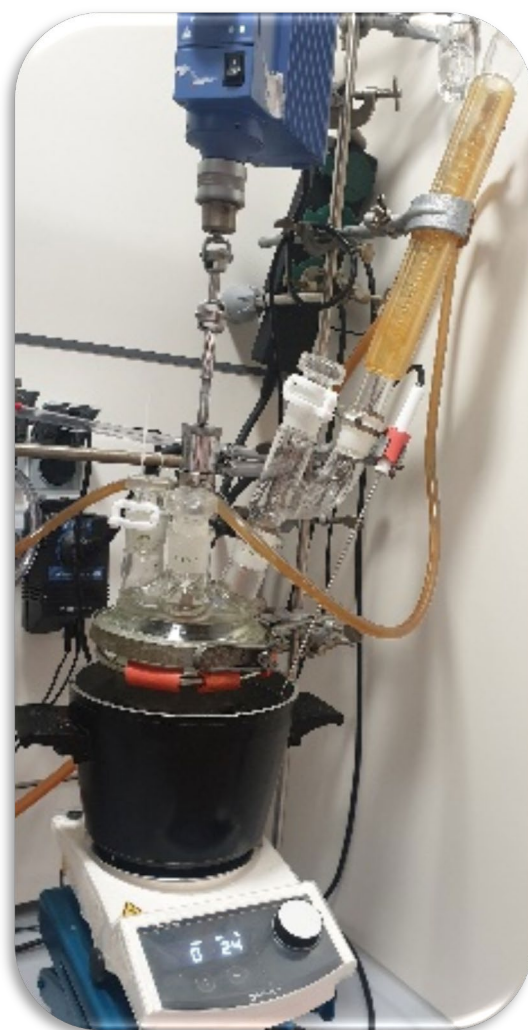

**Fig. S1** Experimental setup for the synthesis of **G-FA**

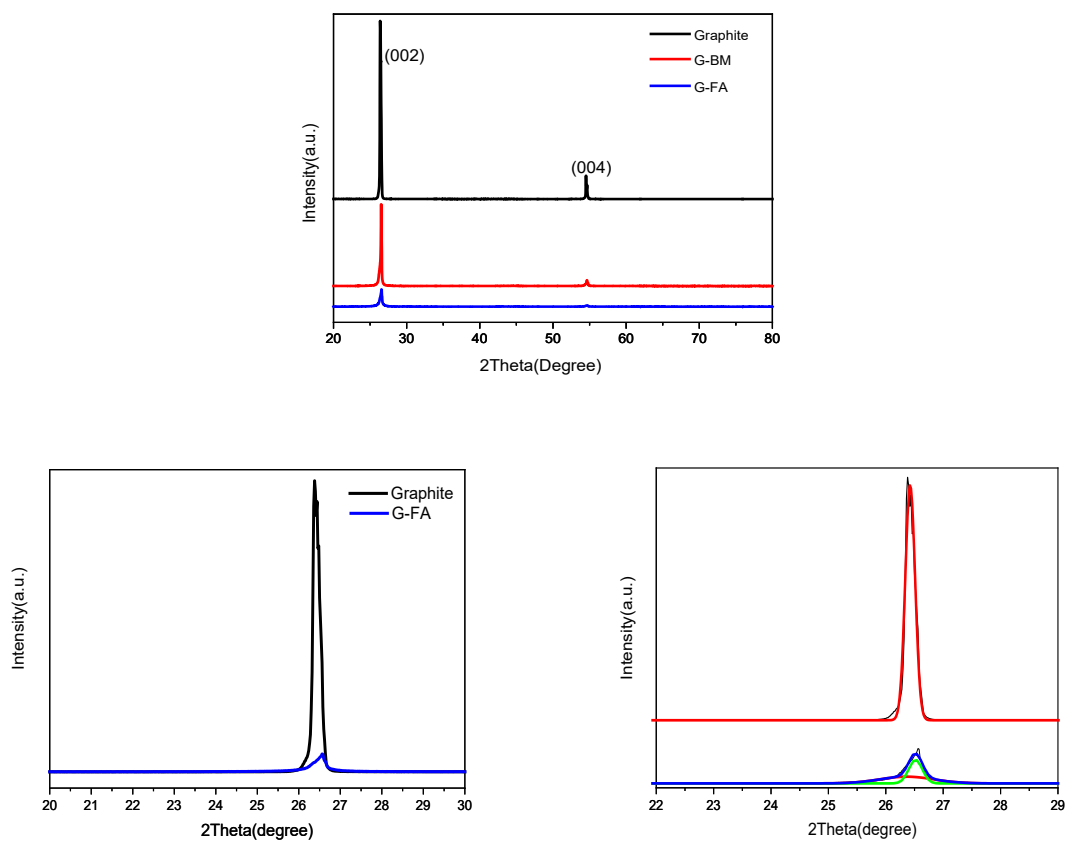

**Fig. S2** XRD patterns of a) **pristine graphite, G-BM and G-FA** b) Expansion of 002 peak of **pristine graphite and G-FA** c) Gaussian peak fitting of (b)

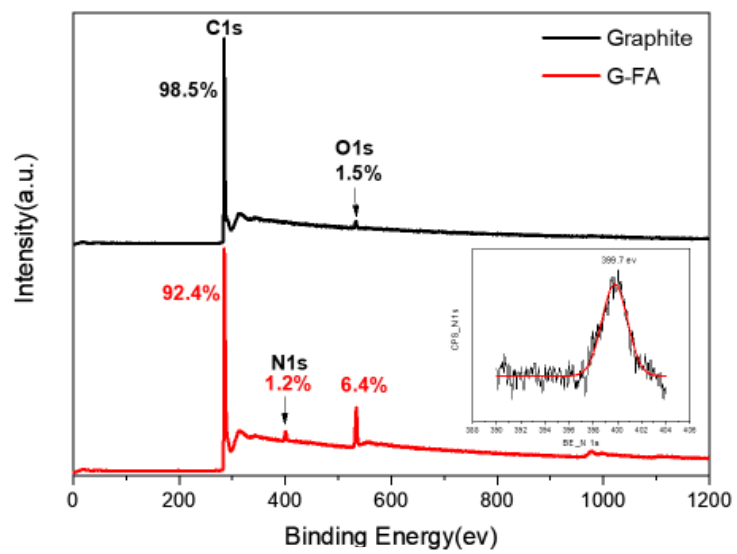

(a)

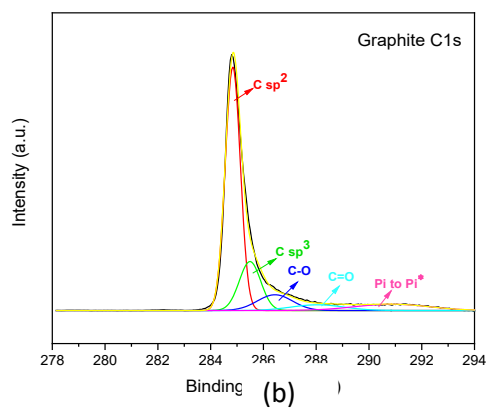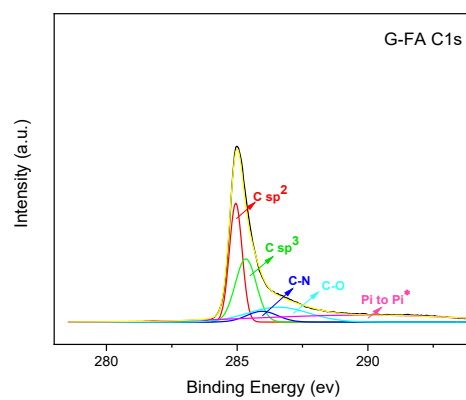

**Fig. S3** a) Survey of XPS of pristine graphite and G-FA b) High resolution C1s after Gauss fitting

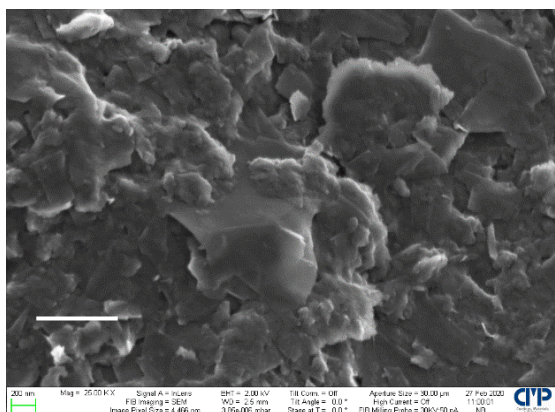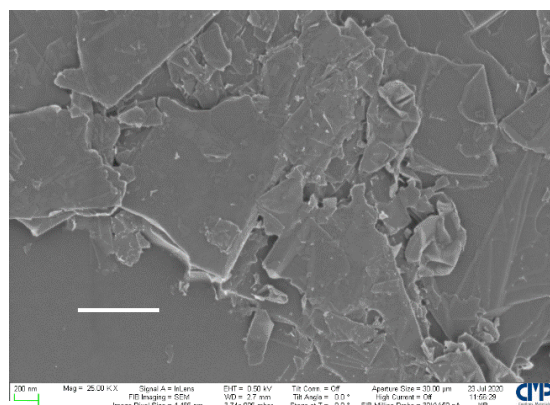

(a)

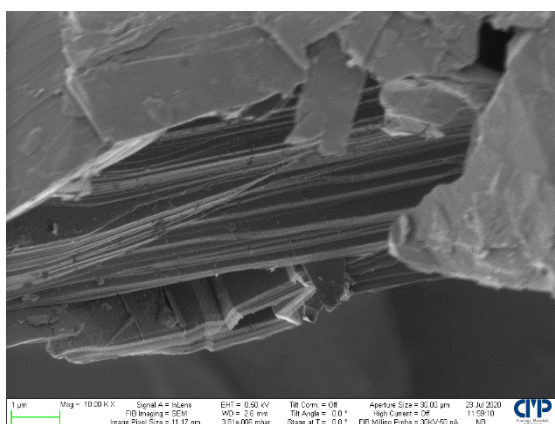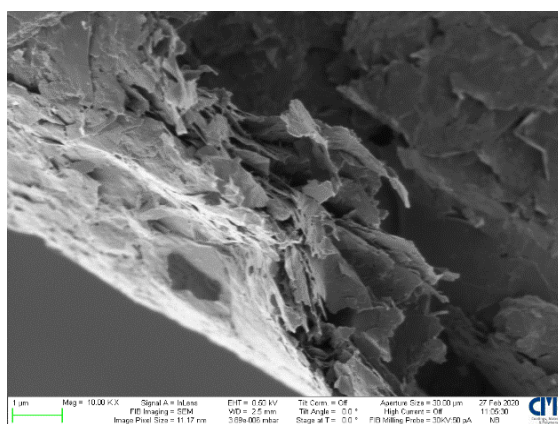

(b)

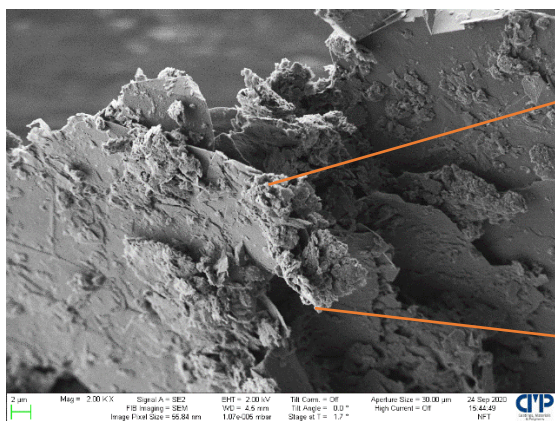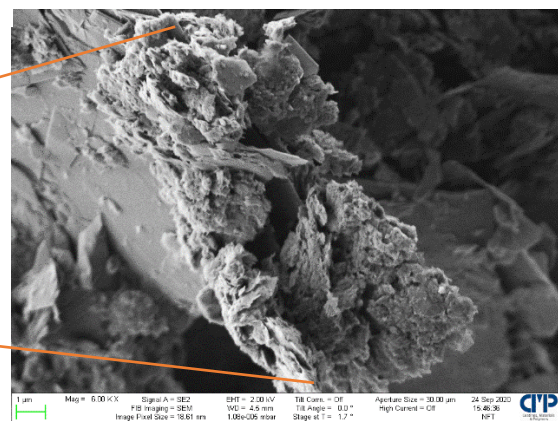

(c)

**Fig. S4.** SEM images a) on the surface of **pristine graphite**(left) and **G-FA** (right) b) at the edge c) scaling up the edge of **G-FA** sample

## AFM measurements

### G-FA:

a)

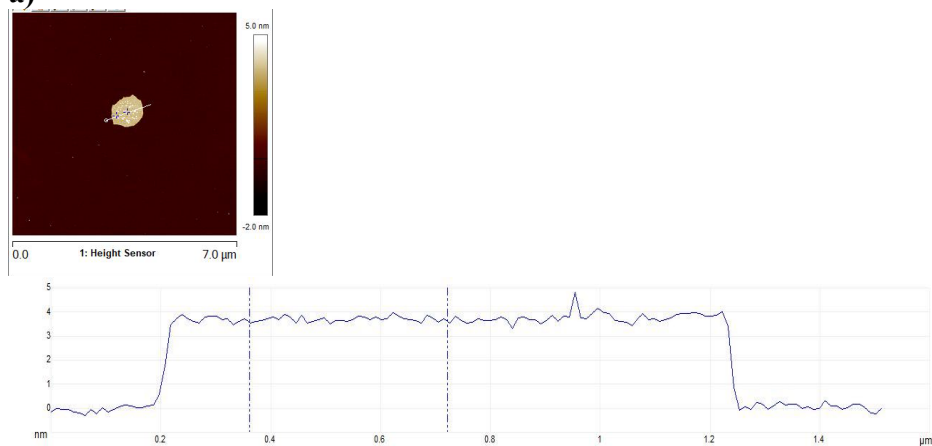

b)

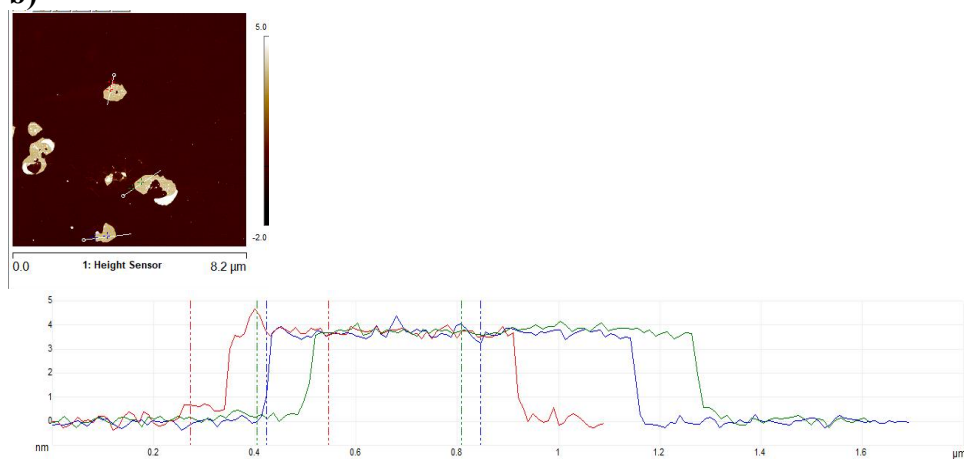

c)  
Graphite:

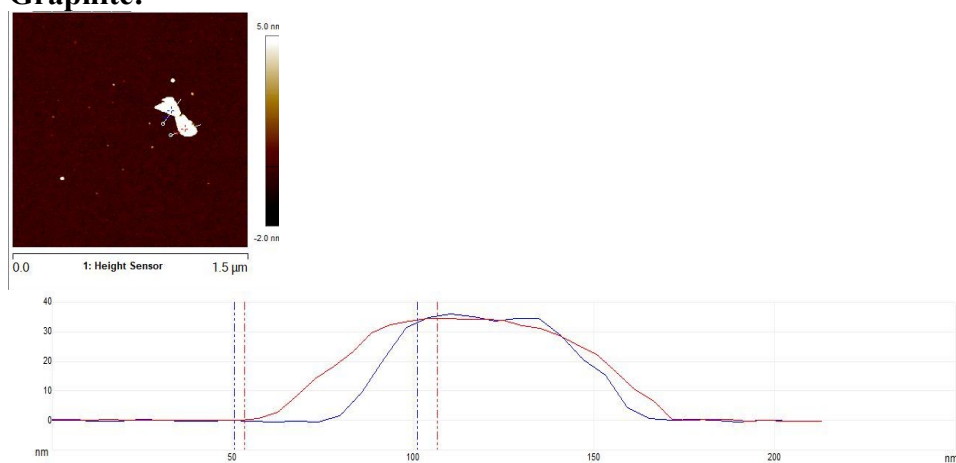

**Fig. S5.** AFM images and graphs for a) G-FA, Scale: 7 micrometer b) G-FA, Scale: 8.2 micrometer c) Pristine graphite, Scale: 1.5 micrometer
